# Supplementary material for: Immunotherapy for Urological Tumors on YouTubeTM: An Information-Quality Analysis
Source: MDPI journal article supplement (doi:10.3390/vaccines11010092), 2022-12-30
Supplement: s1 [file s1]

**Table S1.** Search keyword combinations used on YouTube™ on 25 March 2022.

| Search Keyword Combinations |                                                  |
|-----------------------------|--------------------------------------------------|
| 1                           | Immunotherapy                                    |
| 2                           | Cancer immunotherapy                             |
| 3                           | Renal cancer immunotherapy                       |
| 4                           | Kidney cancer immunotherapy                      |
| 5                           | Bladder cancer immunotherapy                     |
| 6                           | Muscle-invasive bladder cancer immunotherapy     |
| 7                           | Non-muscle invasive bladder cancer immunotherapy |
| 8                           | Urothelial carcinoma immunotherapy               |
| 9                           | Prostate cancer immunotherapy                    |
